# Supplementary material for: Facile synthesis of nitrogen-doped unzipped carbon nanotubes and their electrochemical properties
Source: Royal Society of Chemistry journal article supplement (doi:10.1039/c4ra15008b), 2015-01-01
Supplement: c4ra15008b1.pdf [file c4ra15008b1.pdf]

**Supplementary Material (ESI) for RSC Advances**

**This journal is © The Royal Society of Chemistry 2014**

---

**Electronic Supplementary Information**

**Facile synthesis of nitrogen-doped unzipped carbon nanotubes  
and their electrochemical properties**

**Liang Chen<sup>a,b</sup>, Haihui Zhou<sup>\*a,b</sup>, Shudan Wei<sup>a,b</sup>, Zhongxue Chen<sup>a,b</sup>, Zheng Huang<sup>a,b</sup>,**

**Zhongyuan Huang<sup>a,b</sup>, Chengping Zhang<sup>a,b</sup> and Yafei Kuang<sup>\*a,b</sup>**

*<sup>a</sup>State Key Laboratory for Chemo/Biosensing and Chemometrics, Hunan University,  
Changsha, 410082, PR China*

*<sup>b</sup>College of Chemistry and Chemical Engineering, Hunan University, Changsha, 410082,  
PR China*

**\* Corresponding authors.**

**Tel.: +86 731 88821603;**

**Fax: +86 731 88713642.**

**E-mail addresses: yafeik@163.com (Yafei Kuang) ; haihuizh@163.com(Haihui Zhou)**

**Figure S1.** TGA curves of MWCNTs and N-UCNTs

**Figure S2.** FTIR spectra of MWCNTs and O-UCNTs

**Figure S3.** CV curves of N-UCNTs at the scan rate of 5, 20, 50 and 100  $\text{mV s}^{-1}$  in 6 M KOH electrolyte

**Figure S4.** Nyquist impedance plot of N-NCNTs and UCNTs at open circuit potential

**Figure S5.** The cycle stability of N-UCNTs at a scan rate of 100  $\text{mV s}^{-1}$  for 10000 cycles in 6 M KOH electrolyte
